# Supplementary material for: Salicylaldehyde Suppresses IgE-Mediated Activation of Mast Cells and Ameliorates Anaphylaxis in Mice
Source: MDPI journal article supplement (doi:10.3390/ijms23158826), 2022-08-08
Supplement: s1 [file s1]

**A)**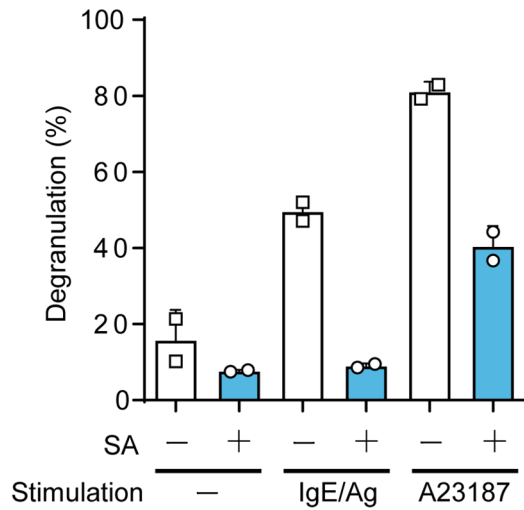**B)**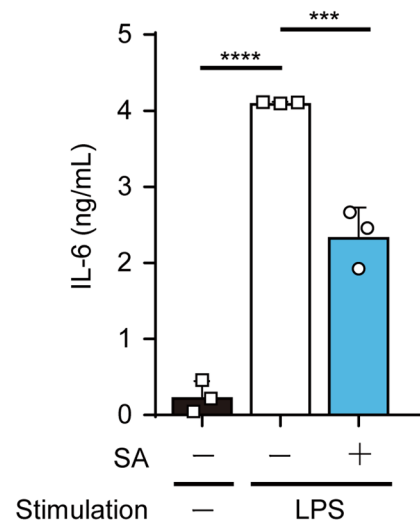

Figure S1. The effects of salicylaldehyde on IgE-independent stimulation of MCs.

(A) Degranulation degree of BMMCs. BMMCs incubated in the presence (SA +) or absence (SA -) of salicylaldehyde for 48 h were stimulated with  $\text{Ca}^{2+}$  ionophore (A23187; 1  $\mu\text{M}$ ).  $n = 2$ .

(B) The effect of salicylaldehyde on LPS-induced IL-6 production by BMMCs. BMMCs treated with salicylaldehyde (SA +) and its control (SA -) were stimulated with 1  $\mu\text{g/mL}$  LPS for 3 h.  $n = 3$ . Dunnett's multiple comparison test was used. \*\*\*,  $p < 0.001$ ; \*\*\*\*,  $p < 0.0001$ .
